# Supplementary material
Source: publisher site journal article supplement (https://static.cambridge.org/content/id/urn:cambridge.org:id:article:S0022112015002256/resource/name/flm1500225supp.zip)
Supplement: Supplementary file 2 [file flm1500225supp.zip]

Archive with 1 entries (1 files):
- FLM_1500225_SupplementaryMaterial.pdf
